# Supplementary material for: IL-4 and SDF-1 Increase Adipose Tissue-Derived Stromal Cell Ability to Improve Rat Skeletal Muscle Regeneration
Source: MDPI journal article supplement (doi:10.3390/ijms21093302), 2020-05-07
Supplement: s1 [file s1]

**Supplementary Table S1. Taqman assays used in qPCR analyzes.**

| <b>Gene</b>                      | <b>Taqman assay no.</b> |
|----------------------------------|-------------------------|
| <i>CD90</i>                      | Rn00562048_m1           |
| <i>CD105</i>                     | Rn01438763_m1           |
| <i>IL4R<math>\alpha</math></i>   | Rn01507024_m1           |
| <i>IL13R<math>\alpha</math>1</i> | Rn01457337_m1           |
| <i>CXCR4</i>                     | Rn01483207_m1           |
| <i>Brachyury</i>                 | Rn01527349_m1           |
| <i>Cdh15</i>                     | Rn01432568_m1           |
| <i>MyoD</i>                      | Rn01457527_g1           |
| <i>Myf5</i>                      | Rn01502778_m1           |
| <i>Myog</i>                      | Rn00567418_m1           |
| <i>CD9</i>                       | Rn01463253_m1           |
| <i>HPRT</i>                      | Rn01527840_m1           |
| <i>Des</i>                       | Rn00574732_m1           |
| <i>DmD</i>                       | Rn00562253_m1           |
| <i>Msgn1</i>                     | Rn01473566_s1           |
